# Supplementary figures and images for: Incomplete and Inaccurate Vocal Imitation after Knockdown of FoxP2 in Songbird Basal Ganglia Nucleus Area X
Source: PLOS journal article supplement (doi:10.1371/journal.pbio.0050321), 2007-11-27

**Fig. S8**

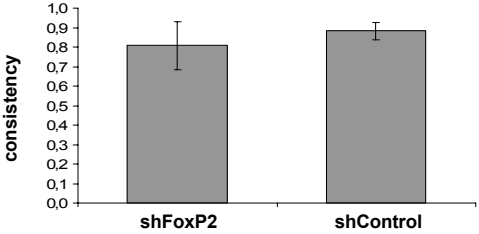

Supplement: S8 (10.1371/journal.pbio.0050321.s008) [file journal.pbio.0050321.s008]
